# Supplementary material for: Nogo Receptor Inhibition Enhances Functional Recovery following Lysolecithin-Induced Demyelination in Mouse Optic Chiasm
Source: PubMed Central journal article supplement (PMC4153612; doi:10.1371/journal.pone.0106378), 2014-09-03
Supplement: pone.0106378.s002.pdf [file pone.0106378.s002.pdf]

**Table S1.** Four different sequences of siRNA against NgR were combined in the same tube for injection.

| siRNA   | Sequence (5'to 3')    | Sense sequence (5' to 3') |
|---------|-----------------------|---------------------------|
| siRNA A | CACCCTCTGGATCTACTCAA  | CCCUCUGGAUCUACUCCAATT     |
| siRNA B | CACCCTCTTTCTCTTCAACAA | CCCUCUUUCUCUUAACAATT      |
| siRNA C | AAGGAGCAGGACTCAGAACAA | GGAGCAGGACUCAGAACAATT     |
| siRNA D | CTGGTGGATTATAAGCCCAAA | GGUGGAUUAUAAGCCCAAATT     |

Selected sequences were subjected to a BLAST search ([www.ncbi.nlm.nih.gov](http://www.ncbi.nlm.nih.gov) PubMed) to ensure that there was no significant homology with other genes. NgR-siRNA Cat no: SI02722888, SI02699186, SI02748333, SI02678249) were purchased from Qiagen.
