# Supplementary material for: Nogo Receptor Inhibition Enhances Functional Recovery following Lysolecithin-Induced Demyelination in Mouse Optic Chiasm
Source: PubMed Central journal article supplement (PMC4153612; doi:10.1371/journal.pone.0106378), 2014-09-03
Supplement: pone.0106378.s004.pdf [file pone.0106378.s004.pdf]

**Table S3. Secondary antibodies used in this study.**

| Secondary Antibody | Catalog No. | Isotype  | Host   | Anti   | Dilution for IHC | Company           |
|--------------------|-------------|----------|--------|--------|------------------|-------------------|
| Alexa Fluor 594    | A11007      | IgG(H+L) | Goat   | Rat    | 1/500            | Invitrogen        |
| Alexa Fluor 488    | A-11030     | IgG(H+L) | Goat   | Rabbit | 1/500            | Invitrogen        |
| Alexa Fluor 488    | A21042      | IgM      | Goat   | Mouse  | 1/500            | Invitrogen        |
| Alexa Fluor 488    | A-11001     | IgG(H+L) | Goat   | Mouse  | 1/500            | Invitrogen        |
| Alexa Fluor 488    | A-21141     | IgG2b    | Goat   | Mouse  | 1/500            | Life Technologies |
| Alexa Fluor 555    | A-31572     | IgG(H+L) | Donkey | Rabbit | 1/500            | Invitrogen        |
